# Supplementary material for: Left ventricular M‐mode prediction intervals in 7651 dogs: Population‐wide and selected breed‐specific values
Source: PubMed Central journal article supplement (PMC7694859; doi:10.1111/jvim.15914), 2020-10-02
Supplement: JVIM-34-2242-s001.pdf [file JVIM-34-2242-s001.pdf]

**A**

LVDd

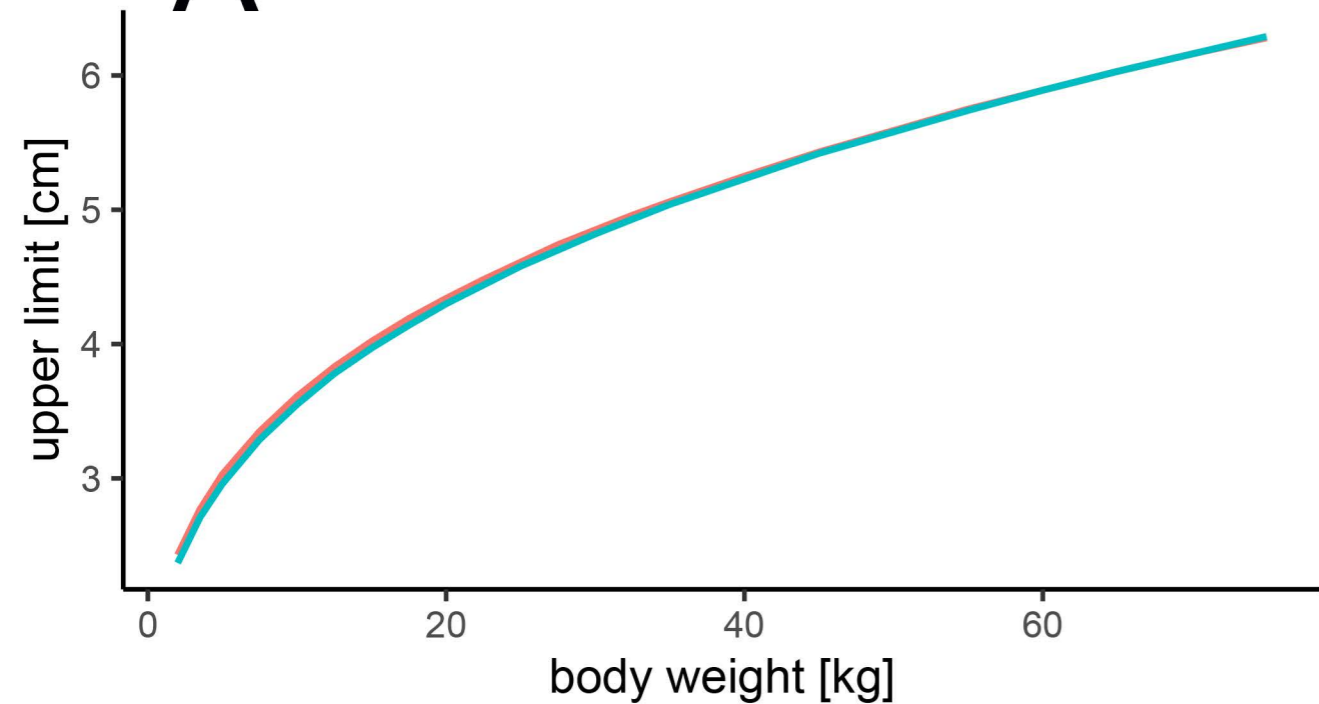

— All non-sighthound dogs — Immaculate non-sighthound dogs

**B**

LVDs

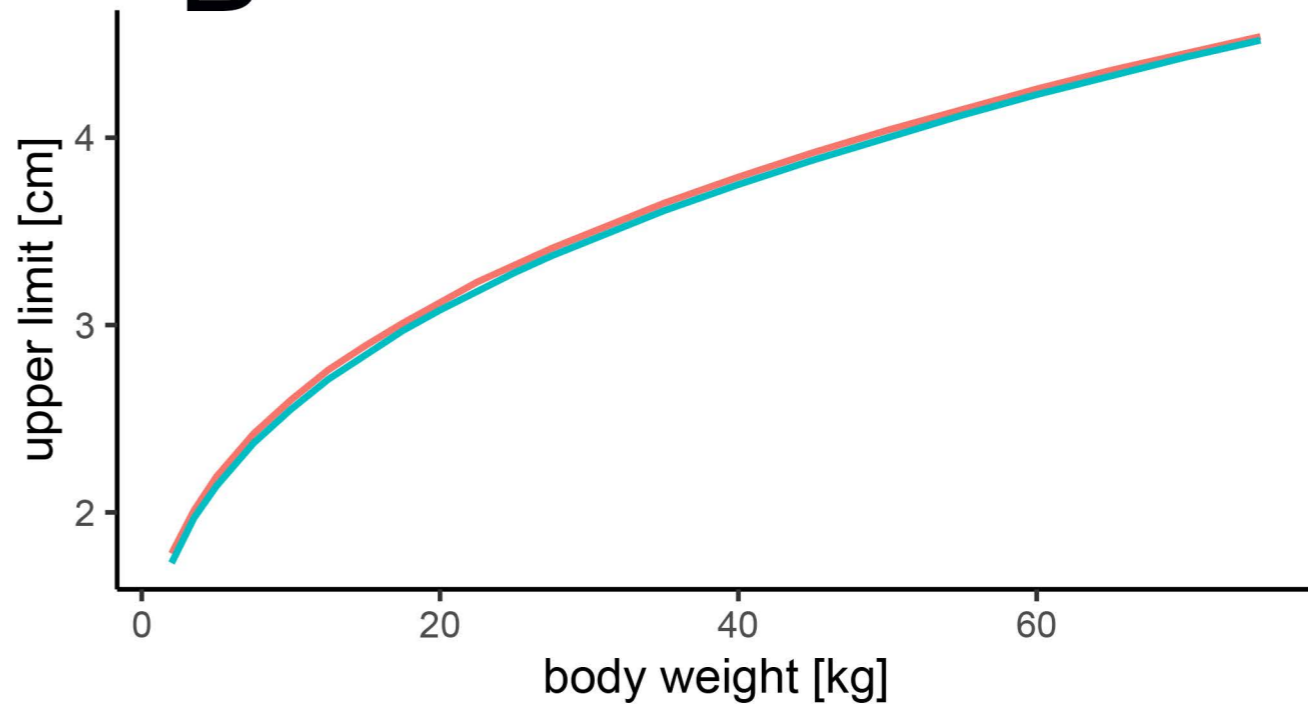

— All non-sighthound dogs — Immaculate non-sighthound dogs
