# Supplementary material for: Left ventricular M‐mode prediction intervals in 7651 dogs: Population‐wide and selected breed‐specific values
Source: PubMed Central journal article supplement (PMC7694859; doi:10.1111/jvim.15914), 2020-10-02
Supplement: JVIM-34-2242-s002.pdf [file JVIM-34-2242-s002.pdf]

**Supplementary Table 1:** Number of dogs in each breed in all 7651 dogs (including sighthounds).

| Breed                         | Number of dogs | Breed                         | Number of dogs |
|-------------------------------|----------------|-------------------------------|----------------|
| Afghan                        | 306            | Korea Jindo Dog               | 1              |
| Airedale Terrier              | 3              | Kuvasz                        | 3              |
| Alaskan Malamute              | 1              | Labrador Retriever            | 159            |
| American Bulldog              | 27             | Leonberger                    | 4              |
| Antikdogge                    | 11             | Lhasa Apso                    | 1              |
| Australian Cattle Dog         | 1              | Magyar Agar                   | 1              |
| Australian Kelpie             | 9              | Malinois                      | 3              |
| Australian Shepherd           | 8              | Malteser                      | 6              |
| Barsoi                        | 9              | Mastiff                       | 4              |
| Basenji                       | 2              | Mastin De Los Pirineos        | 1              |
| Basset Hound                  | 1              | Mastino Napoletano            | 1              |
| Beagle                        | 21             | Miniature Australian Shepherd | 5              |
| Bearded Collie                | 3              | Miniature Dachshund           | 1              |
| Belgian Shepherd Dog          | 1              | Miniature Poodle              | 2              |
| Berger Des Pyrenees           | 11             | Miniature Schnauzer           | 1              |
| Bernese Mountain Dog          | 1              | Mittle German Spitz           | 1              |
| Bichon Frise                  | 3              | Mudi                          | 1              |
| Bobtail                       | 2              | Newfoundland Dog              | 161            |
| Border Collie                 | 8              | Owczarek Podhalanski          | 2              |
| Boston Terrier                | 2              | Papillon                      | 43             |
| Bouvier des Ardennes          | 1              | Parson Russell Terrier        | 11             |
| Boxer                         | 311            | Phalene                       | 2              |
| Bracken                       | 11             | Pinscher                      | 4              |
| Broholmer                     | 4              | Pointer                       | 1              |
| Bullterrier                   | 71             | Polski Owczarek Nizinny       | 121            |
| Cane Corso                    | 13             | Pug                           | 6              |
| Cavalier King Charles Spaniel | 94             | Puli                          | 3              |
| Chihuahua                     | 6              | Pumi                          | 5              |
| Chinese Crested Dog           | 8              | Pyrenean Mountaindog          | 7              |
| Collie                        | 2              | Rhodesian Ridgeback           | 58             |
| Coton de Tuléar               | 1              | Rottweiler                    | 8              |
| Dachshund                     | 18             | Saarloos Wolfhond             | 1              |
| Dalmatian                     | 2              | Saint Bernard dog             | 1              |
| Deerhound                     | 7              | Saluki                        | 302            |
| Doberman Pinscher             | 427            | Samojede                      | 4              |
| Dogo Canario                  | 4              | Saupacker                     | 2              |
| Dogue De Bordeaux             | 32             | Schapendoes                   | 1              |
| English Bulldog               | 34             | Schnauzer                     | 12             |
| English Cocker Spaniel        | 4              | Russian Black Terrier         | 3              |
| English Springer Spaniel      | 4              | Setter                        | 4              |
| Eurasian                      | 2              | Sheltie (Shetland Sheepdog)   | 6              |
| Fila Brasileiro               | 1              | Shih Tzu                      | 3              |
| Flat Coated Retriever         | 7              | Siberian Husky                | 2              |
| French Bulldog                | 203            | Silken Windsprite             | 25             |
| Galgo Espanol                 | 2              | Sloughi                       | 3              |
| Giant Schnauzer               | 7              | Slovensky Kopov               | 23             |
| German Shepherd Dog           | 12             | Small Munsterlander Pointer   | 1              |
| Golden Retriever              | 89             | Stabyhoun                     | 1              |
| Great Dane                    | 900            | Staffordshire Bull Terrier    | 3              |
| Greyhound                     | 2              | Standard Poodles              | 4              |
| Havanese                      | 1              | Suomenajokoirra               | 1              |
| Hovawart                      | 184            | Swiss Shepherd Dog            | 9              |
| Irish Glen Of Imaal Terrier   | 1              | Tibet Terrier                 | 1              |
| Irish Terrier                 | 4              | Welsh Terrier                 | 1              |
| Irish Wolfhound               | 837            | West Highland White Terrier   | 1              |
| Italian Greyhound             | 13             | Whippet                       | 47             |
| Jack Russell Terrier          | 3              | Wolfsspitz                    | 4              |
| Japanese Spitz                | 1              | Yorkshire Terrier             | 3              |
| Komondor                      | 2              | Total                         | 7651           |

**Supplementary Table 2:** Characteristics of dogs of breeds (n=7003) in which echocardiographic measurements were compared to the 95% prediction intervals generated in the all non-sighthound group (n=6097). Sighthound breeds are marked with an asterisk. N = Number of dogs, BW = Median body weight, Age = Mean age.

| Breed                         | N    | BW   | Age | Sex     |       |
|-------------------------------|------|------|-----|---------|-------|
|                               |      |      |     | Female  | Male  |
| Afghan*                       | 306  | 27.0 | 4.6 | 57.5%   | 42.5% |
| Barsoi*                       | 9    | 28.0 | 4.7 | 66.7%   | 33.3% |
| Boxer                         | 3111 | 27.5 | 1.7 | 55.9%   | 44.1% |
| Cavalier King Charles Spaniel | 94   | 8.4  | 3.1 | 60.6%   | 39.4% |
| Deerhound*                    | 7    | 45.3 | 4.6 | 42.9%   | 57.1% |
| Doberman                      | 427  | 36.0 | 4.2 | 55.3%   | 44.7% |
| French Bulldog                | 203  | 12.0 | 1.6 | 64.0%   | 36.0% |
| Galgo Espanol*                | 2    | 20.8 | 7.2 | 100.0 % | -     |
| Golden Retriever              | 89   | 29.7 | 2.7 | 51.7%   | 48.3% |
| Great Dane                    | 900  | 63.5 | 3.6 | 61.2%   | 38.8% |
| Greyhound*                    | 2    | 32.4 | 3.5 | 100.0%  | -     |
| Hovawart                      | 184  | 36.1 | 4.1 | 41.3%   | 58.7% |
| Italian Greyhound*            | 13   | 4.8  | 1.7 | 53.9%   | 46.1% |
| Irish Wolfhound*              | 837  | 60.0 | 3.2 | 65.6%   | 34.4% |
| Labrador Retriever            | 159  | 30.0 | 3.7 | 47.2%   | 52.8% |
| Magyar Agar*                  | 1    | 24.0 | 7.6 | 100.0%  | -     |
| Newfoundland Dog              | 161  | 53.7 | 3.1 | 60.9%   | 39.1% |
| Polski Owczarek Nizinny       | 121  | 18.1 | 2.7 | 57.0%   | 43.0% |
| Saluki*                       | 302  | 22.4 | 4.4 | 54.6%   | 45.4% |
| Silken Windsprite*            | 25   | 11.4 | 3.8 | 52.0%   | 48.0% |
| Sloughi*                      | 3    | 28.0 | 3.3 | 33.3%   | 66.7% |
| Whippet*                      | 47   | 13.0 | 2.9 | 51.2%   | 48.8% |

**Supplementary Table 3:** Estimates of mean difference between the upper limits (of all measured variables LVDD, LVDs, IVSd, IVSs, LVWd and LVWs) of the groups *all non-sighthound dogs* ( $n=6097$ ) and *immaculate non-sighthound dogs* ( $n=1794$ ) based on a generalized additive model including a non-linear effect of body weight.

|                         | Estimate | Standard Error | P-value |
|-------------------------|----------|----------------|---------|
| Intercept               | 2.460    | 0.087          | <0.001  |
| All non-sighthound dogs | 0.009    | 0.123          | 0.942   |

**Supplementary Table 4:** Estimated interobserver variability (in percent) based on the weight-independent residual variance for the examined echocardiographic variables in *the all non-sighthound group (n=6097)*.

| Parameter | Interobserver-Variability in percent |
|-----------|--------------------------------------|
| LVDd      | 10.2                                 |
| LVDs      | 8.1                                  |
| IVSd      | 18.8                                 |
| IVSs      | 24.0                                 |
| LVWd      | 30.6                                 |
| LVWs      | 20.6                                 |
